# Supplementary material for: Is there an association between long-term antibiotics for acne and subsequent infection sequelae and antimicrobial resistance? A systematic review protocol
Source: PubMed Central journal article supplement (PMC7333805; doi:10.1136/bmjopen-2019-033662), 2020-07-02
Supplement: bmjopen-2019-033662.draft_revisions.pdf [file bmjopen-2019-033662.draft_revisions.pdf]

# BMJ Open

BMJ Open is committed to open peer review. As part of this commitment we make the peer review history of every article we publish publicly available.

When an article is published we post the peer reviewers' comments and the authors' responses online. We also post the versions of the paper that were used during peer review. These are the versions that the peer review comments apply to.

The versions of the paper that follow are the versions that were submitted during the peer review process. They are not the versions of record or the final published versions. They should not be cited or distributed as the published version of this manuscript.

BMJ Open is an open access journal and the full, final, typeset and author-corrected version of record of the manuscript is available on our site with no access controls, subscription charges or pay-per-view fees (<http://bmjopen.bmj.com>).

If you have any questions on BMJ Open's open peer review process please email [info.bmjopen@bmj.com](mailto:info.bmjopen@bmj.com)

# BMJ Open

## Is there an association between long-term antibiotics for acne and subsequent infection sequelae and antimicrobial resistance? Systematic review protocol

|                               |                                                                                                                                                                                                                                                                                                                                                                                                                                                                                                                                                                                                                                                                                                                                                                                                                                                            |
|-------------------------------|------------------------------------------------------------------------------------------------------------------------------------------------------------------------------------------------------------------------------------------------------------------------------------------------------------------------------------------------------------------------------------------------------------------------------------------------------------------------------------------------------------------------------------------------------------------------------------------------------------------------------------------------------------------------------------------------------------------------------------------------------------------------------------------------------------------------------------------------------------|
| Journal:                      | <i>BMJ Open</i>                                                                                                                                                                                                                                                                                                                                                                                                                                                                                                                                                                                                                                                                                                                                                                                                                                            |
| Manuscript ID                 | bmjopen-2019-033662                                                                                                                                                                                                                                                                                                                                                                                                                                                                                                                                                                                                                                                                                                                                                                                                                                        |
| Article Type:                 | Protocol                                                                                                                                                                                                                                                                                                                                                                                                                                                                                                                                                                                                                                                                                                                                                                                                                                                   |
| Date Submitted by the Author: | 16-Oct-2019                                                                                                                                                                                                                                                                                                                                                                                                                                                                                                                                                                                                                                                                                                                                                                                                                                                |
| Complete List of Authors:     | Bhate, Ketaki; London School of Hygiene and Tropical Medicine Faculty of Epidemiology and Population Health,<br>Lin, Liang-Yu; London School of Hygiene and Tropical Medicine Faculty of Epidemiology and Population Health, Department of Non-communicable Disease Epidemiology;<br>Barbieri, John<br>Leyrat, Clémence; London School of Hygiene and Tropical Medicine, Department of Medical Statistics<br>Hopkins, Susan; Public Health England<br>Stabler, Richard<br>Shallcross, Laura; University College London<br>Smeeth, Liam; London School of Hygiene and Tropical Medicine Faculty of Epidemiology and Population Health<br>Francis, Nick A.; Cardiff University<br>Langan, Sinead; London School of Hygiene and Tropical Medicine<br>Sinnott, Sarah-Jo; London School of Hygiene and Tropical Medicine, Non-communicable disease epidemiology |
| Keywords:                     | Acne < DERMATOLOGY, antimicrobial resistance, EPIDEMIOLOGY                                                                                                                                                                                                                                                                                                                                                                                                                                                                                                                                                                                                                                                                                                                                                                                                 |
|                               |                                                                                                                                                                                                                                                                                                                                                                                                                                                                                                                                                                                                                                                                                                                                                                                                                                                            |

SCHOLARONE™  
Manuscripts

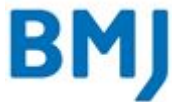

I, the Submitting Author has the right to grant and does grant on behalf of all authors of the Work (as defined in the below author licence), an exclusive licence and/or a non-exclusive licence for contributions from authors who are: i) UK Crown employees; ii) where BMJ has agreed a CC-BY licence shall apply, and/or iii) in accordance with the terms applicable for US Federal Government officers or employees acting as part of their official duties; on a worldwide, perpetual, irrevocable, royalty-free basis to BMJ Publishing Group Ltd ("BMJ") its licensees and where the relevant Journal is co-owned by BMJ to the co-owners of the Journal, to publish the Work in this journal and any other BMJ products and to exploit all rights, as set out in our [licence](#).

The Submitting Author accepts and understands that any supply made under these terms is made by BMJ to the Submitting Author unless you are acting as an employee on behalf of your employer or a postgraduate student of an affiliated institution which is paying any applicable article publishing charge ("APC") for Open Access articles. Where the Submitting Author wishes to make the Work available on an Open Access basis (and intends to pay the relevant APC), the terms of reuse of such Open Access shall be governed by a Creative Commons licence – details of these licences and which [Creative Commons](#) licence will apply to this Work are set out in our licence referred to above.

Other than as permitted in any relevant BMJ Author's Self Archiving Policies, I confirm this Work has not been accepted for publication elsewhere, is not being considered for publication elsewhere and does not duplicate material already published. I confirm all authors consent to publication of this Work and authorise the granting of this licence.

## BMJ PROTOCOL

### Title

Is there an association between long-term antibiotics for acne and subsequent infection sequelae and antimicrobial resistance? Systematic review protocol

### Authors

Dr Ketaki Bhate<sup>1</sup> [ksbhate@outlook.com](mailto:ksbhate@outlook.com) <https://orcid.org/0000-0001-5509-4428>

Dr Liang-Yu Lin<sup>1</sup> [liang-yu.lin@lshtm.ac.uk](mailto:liang-yu.lin@lshtm.ac.uk) <https://orcid.org/0000-0003-4720-6738>

Dr John Barbieri<sup>2</sup> [john.barbieri@uphs.upenn.edu](mailto:john.barbieri@uphs.upenn.edu) <https://orcid.org/0000-0002-5467-4102>

Dr Clemence Leyrat<sup>1</sup> [clemence.leyrat@lshtm.ac.uk](mailto:clemence.leyrat@lshtm.ac.uk) <https://orcid.org/0000-0002-4097-4577>

Dr Susan Hopkins<sup>2</sup> [susan.hopkins@phe.gov.uk](mailto:susan.hopkins@phe.gov.uk) <https://orcid.org/0000-0001-5179-5702>

Dr Richard Stabler<sup>3</sup> [Richard.stabler@lshtm.ac.uk](mailto:Richard.stabler@lshtm.ac.uk) <https://orcid.org/0000-0002-2402-6630>

Dr Laura Shallcross<sup>4</sup> [l.shallcross@ucl.ac.uk](mailto:l.shallcross@ucl.ac.uk) <https://orcid.org/0000-0003-1713-2555>

Professor Liam Smeeth<sup>1</sup> [liam.smeeth@lshtm.ac.uk](mailto:liam.smeeth@lshtm.ac.uk) <https://orcid.org/0000-0002-9168-6022>

Professor Nick Francis<sup>5</sup> [francisna@cardiff.ac.uk](mailto:francisna@cardiff.ac.uk) <https://orcid.org/0000-0001-8939-7312>

Professor Sinéad Langan<sup>1\*</sup> [sinead.langan@lshtm.ac.uk](mailto:sinead.langan@lshtm.ac.uk) <https://orcid.org/0000-0002-7022-7441>

Dr Sarah-Jo Sinnott<sup>1\*</sup> [sarah-jo.sinnott@lshtm.ac.uk](mailto:sarah-jo.sinnott@lshtm.ac.uk) <https://orcid.org/0000-0001-7586-686X>

\*Senior authors

### Author affiliations

1. Faculty of Epidemiology and Population Health, London School of Hygiene and Tropical Medicine, Keppel Street, London.
2. University of Pennsylvania, Perelman School of Medicine, Philadelphia.
3. AMR Division, Public Health England.
4. Faculty of Infectious and Tropical Diseases, London School of Hygiene and Tropical Medicine, Keppel Street, London.
5. Faculty of Population Health Sciences, University College London.
6. School of Medicine, University of Cardiff.

1  
2  
3  
4  
5 Correspondence to: Dr Ketaki Bhate  
6  
7

8 London School of Hygiene and Tropical Medicine, Keppel Street, WC1E 7HT  
9

10 [Ketaki.bhate@lshtm.ac.uk](mailto:Ketaki.bhate@lshtm.ac.uk)  
11  
12  
13  
14

15 **Word count**

16  
17 2060  
18  
19

20 **Keywords**

21  
22 Acne vulgaris, antibiotic, antimicrobial resistance, tetracycline, macrolide, dihydrofolate reductase  
23 inhibitor  
24  
25  
26  
27

28 **Author contributions**

29  
30 Ketaki Bhate wrote the protocol. Sinéad Langan and Sarah-Jo Sinnott supervised the writing process  
31 and contributed equally. Ling-Yu Lin, Clemence Leyrat, Richard Stabler, Laura Shallcross, Susan  
32 Hopkins, Nick Francis and Liam Smeeth form an advisory group and reviewed the protocol.  
33  
34  
35  
36  
37  
38

39 **Funding statement**

40  
41 Ketaki Bhate is funded by an NIHR Doctoral Research Fellowship DRF-2018-11-ST2-066.  
42  
43

44 SML is funded by a Wellcome Trust Senior Clinical Fellowship (205039/Z/16/Z).  
45  
46

47 Dr. Barbieri is supported by the National Institute of Arthritis and Musculoskeletal and Skin Diseases  
48 of the National Institutes of Health under award number T32-AR-007465.  
49  
50

51 **Disclaimer:**

52  
53  
54 The views expressed are those of the author(s) and not necessarily those of the NHS, the NIHR or the  
55 Department of Health and Social Care.  
56  
57  
58  
59  
60

### Competing interests

John Barbieri receives partial salary support through a Pfizer Fellowship grant to the Trustees of the University of Pennsylvania.

For peer review only

## ABSTRACT:

### Introduction

Antimicrobial resistance (AMR) is a global health emergency. Acne vulgaris is a highly prevalent condition, and the dominant role antibiotics play in its treatment is a major concern. Antibiotics are widely used in the treatment of acne predominantly for their anti-inflammatory effect, hence their use in acne may not be optimal. Tetracyclines and macrolides are the two most common oral antibiotics classes prescribed, and average use can extend from –a few months to several years of intermittent or continuous use. This systematic review aims to elucidate what is known about oral antibiotics for acne contributing to AMR.

### Methods and Analysis

A systematic review will be conducted to address the question: What is the existing evidence that long-term oral antibiotics used to treat acne in those over 8 years of age contribute towards increased infectious outcomes or other outcomes suggestive of the impact of AMR? We will search the following databases: Embase, MEDLINE, the Cochrane library and Web of Science. Search terms will be developed in collaboration with a librarian by identifying keywords from relevant articles and by undertaking pilot searches. Randomised-control trials, cohort and case-controlled studies conducted in any health care setting and published in any language will be included. The searches will be re-run prior to final analyses to capture the recent literature. The Cochrane tool for bias assessment in randomised trials and ROBINS-I for the assessment of bias in non-randomised studies will be used to assess the risk of bias of included studies. GRADE will be used to make an overall assessment of the quality of evidence.<sup>1</sup> A quantitative assessment will be undertaken of the outcome measures if the individual studies are sufficiently homogenous. If a quantitative assessment is not possible, a qualitative assessment will be presented as a narrative review.

### Ethics and dissemination

Ethical approval is not required for this systematic-review. The results will be published in a peer-reviewed journal and any deviations from the protocol will be clearly documented in the published manuscript of the full systematic-review.

### Prospero registration number

CRD42019121738.

### Strengths and limitations of this study

- To our knowledge, this is the first comprehensive systematic review that will address the use of oral antibiotics for acne and their contribution to antimicrobial resistance
- Screening, data extraction and quality assessment will be undertaken independently by three medically qualified researchers with training in systematic review methodology, thereby ensuring scientific rigour, transparency and repeatability
- There are no date or language restrictions; however, this systematic review does not examine the grey literature

For peer review only



## Introduction

The future effectiveness of antibiotics is in jeopardy with the World Health Organisation declaring the threat of Antimicrobial Resistance (AMR) a most urgent crisis.<sup>2</sup> Future deaths from infections as a result of AMR without any intervention is estimated at 10 million per year and by 2050, the cost of AMR could reach 100 trillion USD.<sup>3</sup>

Topical and oral antibiotics are commonly prescribed for the treatment of acne vulgaris, a chronic non-infectious skin disorder with onset predominantly in adolescence. Given the psychosocial consequences and potential for permanent disfigurement with scarring, it is imperative that people with acne receive effective treatment.<sup>4, 5</sup> Prevalence studies show that 80-100% of teenagers have acne and that 20% are moderately to severely affected. The high prevalence means that both topical and oral antibiotics are used in a large proportion of the adolescent population and for variable durations ranging from 6 weeks to many months, and in some cases, several years.<sup>6, 7</sup> Differences between international guidelines regarding duration of treatment is one of the reasons that antibiotics for acne are used for significantly longer than recommended as there is uncertainty about the optimal duration of treatment.<sup>7-12</sup> Tetracyclines and macrolides are the two of the most common oral antibiotic classes prescribed for acne with varying durations of average use depending on treatment setting and between different countries.<sup>7, 13</sup>

The overuse of antibiotics is a known cause of AMR as repeated and sustained exposure allows microbes to develop mechanisms to avoid the effects of the drugs designed to treat them and allows selection in favour of bystander or commensal bacteria with resistance subsequently cause invasive infection. Although acne is not an infectious disease and aetiologically is multifactorial, we already know that some strains of *Cutibacterium acnes* (formally *Propionibacterium acnes*), the bacteria pathophysiologically associated with acne, are now resistant to commonly used antibiotics in acne, making their initial use as anti-microbial agents futile.<sup>14, 15</sup> However, we do not know how these long-term antibiotics for acne may attenuate microbiota elsewhere at other body sites, and the ability of other bacteria at other infective sites to withstand the effect of antibiotics. Despite this, the anti-inflammatory effect and proven efficacy of antibiotics in treating acne ensures their continued use<sup>16</sup>, albeit their effects may not be sustained. Considering the relationship between long term exposure to antibiotics and AMR, this practice may not be optimal.

The effects long-term antibiotics for acne have on future infections caused by resistant organisms, subsequent antibiotic treatment failure or the rate of infections (or any other measures which may indicate antimicrobial resistance) and how long any effect may last, is not yet known and has not been systematically reviewed in the literature before. While antibiotic stewardship programmes have been

1  
2  
3 shown to be effective<sup>17</sup> in other settings, to ensure their successful execution, robust evidence must  
4 be generated to show that using antibiotics in the treatment of acne has important implications for  
5 future infective episodes and resistance sequelae. Until there is evidence of how the use of oral  
6 antibiotics for acne may cause AMR, changing current practice will be challenging.<sup>18</sup>  
7  
8  
9

10 Given the global health emergency of AMR and the dominant role antibiotics play in the treatment of  
11 acne – a highly prevalent and ubiquitous skin condition worldwide, there is a clearly defined evidence  
12 gap which needs to be urgently addressed.<sup>19</sup> This systematic review aims to establish what is already  
13 known about resistance sequelae for those with acne who are treated with long-term topical or oral  
14 antibiotics.<sup>20</sup>  
15  
16  
17  
18  
19  
20  
21

## 22 **Methods and Analysis**

### 23 **Literature search strategy**

24  
25 We will search the following databases; Embase, Medline, Cochrane and Web of Science. We will  
26 develop search terms by identifying keywords from relevant articles and by undertaking pilot searches  
27 to identify index or Mesh terms. We will modify the search terms according to each database e.g. the  
28 MeSH terms in Medline and Emtree terms in Embase. Searches will be undertaken by the lead author  
29 who has medical and search training in collaboration with a librarian. Search strategies will be  
30 reviewed by all authors. The searches will be kept as broad as possible for example, by using the  
31 'explode' function on the Ovid platform to maximise the number of relevant articles. The search  
32 strategy is available to view in the accompanying supplement. Searches will be undertaken in July  
33 2019 and will go back to inception of the databases.  
34  
35  
36  
37  
38  
39  
40  
41  
42  
43  
44

### 45 **Eligibility criteria**

#### 46 **Inclusion criteria:**

- 47 • To address the question, the following inclusion criteria will apply:
  - 48 ○ **Population:** A study population including participants aged over the age of 8 in any  
49 healthcare setting.
  - 50 ○ **Intervention:** Oral antibiotics prescribed for acne, for a minimum of 28 days of daily  
51 dosing.
  - 52 ○ **Comparison:** People who have not been treated with oral antibiotics for acne (or  
53 general population).  
54  
55  
56  
57  
58  
59  
60

- **Outcome:** Any measure, including proxy measures. The primary outcome is antibiotic treatment failure or infection caused by a resistant organism. The secondary outcome is the detection of resistant organisms without an infection, rate of infection or changes to flora. Any measure including proxy measures will be used.
- Original studies will be eligible for assessment for inclusion if they address the specific research question.
- Randomised controlled trials (of any trial design).
- Observational studies limited to cohort and case-control studies.
- We will include conference abstracts if the full paper is unpublished and can be obtained from the authors.

#### Exclusion criteria:

- Ecological studies and studies that do not assess temporality such as case-series and case reports.
- We will exclude, unpublished studies, ongoing studies and the grey literature.
- In addition studies which only look at antimicrobial resistance to *Propionibacterium acnes* or *P. acnes* or *Cutibacterium acnes C. acnes*.
- Studies including people who are under the age of 8 exclusively will be excluded. The age of 8 was chosen as acne vulgaris is unlikely to present in younger children and in addition, tetracyclines are not recommended in younger children – the BNF recommends tetracyclines are given to children aged 12 years and above.
- Studies including people who are treated with antibiotics for other acne subtypes e.g. hidradenitis suppurativa or drug induced acne.

#### Exposure

At least 28 days of continuous oral antibiotics for acne, the duration helping ensure treatment is not targeted at an acute infective episode and in addition, 28 days is the minimum duration a prescription will be issued for an antibiotic treatment of acne. The exposure is likely to include commonly used antibiotic classes – tetracyclines, macrolides and dihydrofolate reductase inhibitors, however there will be no limits placed on the antibiotic class used to treat acne.

### Comparator

No exposure to long-term oral antibiotics within an acne population or within a general population.

### Outcome

The primary outcome is antibiotic treatment failure or infection caused by a resistant organism. The secondary outcome is the detection of resistant organisms without an infection, rate of infection or changes to flora. This will include any measure of AMR, for example, laboratory measures (such as C-reactive Protein or culture), patient observations (such as an elevated temperature and/or pulse rate which may indicate an infective process) or proxy measures that may have been used in epidemiological studies, for example, difficult to treat infections. Each outcome will be assessed separately. The outcome can occur at any time point after at least 28 days of continuous oral antibiotic exposure for acne; we will stratify according to length of follow up, e.g. up to 6 months, 6 month to 1 year, 1-2 years etc.

### Potential confounding variables

Confounding factors that may be considered by studies investigating treatment failure or AMR as a result of long-term antibiotics for acne are: age, sex, socioeconomic status, medical conditions such as primary immunodeficiency, diabetes, asthma, cancer requiring immunosuppressive medication, recent hospitalization within the last 6 months, repeated admissions to hospital, any recurrent infections, other prescribed medication in particular immunosuppressive therapy including oral corticosteroids, smoking, alcohol use and ethnicity. The inclusion of these confounding factors will be acknowledged in the bias assessment of each study along with a statement of the direction and magnitude of bias their omission may be associated with.

### Eligibility assessment and data extraction

**Phase 1:** Covidence, an online literature review data management programme will be used to facilitate the systematic review process, inclusive of title and abstract screening, full paper retrieval and storage and decisions on which papers to include at full text review. In the first phase, all titles and abstracts will be uploaded to Covidence. Duplicates will then be removed by the lead reviewer (KB). Three reviewers, KB, LYL and JB will then independently screen the search results based on title and abstract. Each title will require two votes. Consensus will be achieved on the number of titles and abstracts to include in the full study review. Any disputes will be resolved by the involvement of a 4th reviewer, SML.

1  
2  
3 **Phase 2:** Full text papers will be assessed independently by the reviewer pairs using a standardised  
4 data extraction form. The extraction tool will be piloted using the first 3 included records, after which  
5 modifications may be made following discussion with other members of the review team. The quality  
6 of the studies will be scored using assessment tools and free text explanations for the score given will  
7 be included on the score sheet and will also be included in supplementary material in the manuscript.  
8 Any disagreements will be discussed by the three reviewers (KB, LYL and JB) and in instances of  
9 disagreement, a 4th reviewer (SML) will make a final decision. If ambiguity still remains after the full  
10 text is obtained, the study authors will be contacted for further clarification.  
11  
12  
13  
14  
15  
16

### 17 Data items

18  
19 Three data domains will be extracted:  
20  
21

#### 22 Data relating to study design

23  
24 Author, country, specific study design, the year the study was conducted or the years over which the  
25 data were collected. Healthcare setting, the number of study participants, the ages of the participants,  
26 the gender balance, and the characteristics and number of comparators, if any. If the study is a trial,  
27 then specifics of the study design such as randomisation, allocation concealment and blinding will be  
28 noted.  
29  
30  
31  
32

#### 33 Data relating to exposure

34  
35 The class of antibiotic used, the median/mean length of treatment of acne with the antibiotic, the  
36 definition of long-term treatment with antibiotics used in the study, the number of participants  
37 exposed to antibiotics and if multiple courses are prescribed, the length of time between antibiotic  
38 courses and the intervention applied to comparators.  
39  
40  
41  
42  
43  
44

#### 45 Data relating to outcomes

46  
47 The measure of antibiotic treatment failure or AMR and the degree of antibiotic treatment failure or  
48 AMR, e.g. repeat course required, hospitalisation or death. The length of follow up will be stratified.  
49  
50  
51  
52  
53

### 54 **Study quality assessment**

55  
56 Each study will be critically appraised by reviewers. The Cochrane tool for bias assessment and the  
57 ROBINS-I tool for the assessment of bias in non-randomised studies will be used to assess the risk of  
58 bias in included studies.<sup>21, 22</sup> GRADE will be used to make an overall assessment of the quality of  
59  
60

1  
2  
3 evidence.<sup>1</sup> Pairs of reviewers will make independent assessments of the risk of bias. Markers of bias  
4 depending on study design included in the aforementioned scoring tools will include factors such as  
5 the method of participant selection, follow up, randomisation, adjustment for confounding and  
6 measurement error of exposures or outcomes. If a proportion of studies have a high risk of bias found  
7 using the scoring tool, we will do a sensitivity analysis excluding them.  
8  
9  
10  
11  
12  
13

#### 14 **Data synthesis/ statistical analysis**

15  
16 We will analyse interventional and observational studies separately. If there is homogeneity across  
17 studies and a meta-analysis is possible, we will generate a pooled effect estimate for those exposed  
18 to long-term antibiotics and those unexposed within each category of study design. If there are a  
19 sufficient number of studies, subgroup analyses will be undertaken for example, by class of antibiotic  
20 and antibiotic treatment duration. The  $I^2$  statistic will be used to assess heterogeneity.<sup>23</sup> Sources of  
21 heterogeneity may include methodology, age of participants, study duration, the confounding factors  
22 considered, the exposure (i.e. length/duration, the class of antibiotic), the comparators and the  
23 outcomes measured. If heterogeneity is above 50% we will not undertake a meta-analysis. If studies  
24 are sufficiently homogenous with regard to exposures, comparators and outcomes, a random effects  
25 model will be used to generate a pooled relative risk and its 95% confidence interval. Study  
26 characteristics and the effect estimate for the association between antibiotics for acne and the specific  
27 measure of AMR will be clearly presented. We will also do a sensitivity analysis using a fixed effects  
28 model. Publication bias will be assessed using Funnel plots and Egger tests.<sup>24</sup> Forest plots will be  
29 presented. All statistical analyses will be performed using Stata. If quantitative synthesis is not possible  
30 due to heterogeneity, we will conduct a narrative synthesis. We will also study each category of  
31 outcome measure separately: e.g. laboratory based measures of resistance or outcome measures  
32 thought to be proxies for AMR using routinely collected health records. An overall description of the  
33 strength of the body of evidence generated using GRADE will be described.<sup>22</sup>  
34  
35  
36  
37  
38  
39  
40  
41  
42  
43  
44  
45  
46  
47

48 The study will be reported following PRISMA guidance.<sup>20</sup>

#### 49 **Patient and Public involvement**

50  
51 This systematic review has been informed by the results of the acne Priority Setting Partnership (PSP)  
52 (acnepsp.org) in collaboration with the James Lind Alliance ([www.jla.nihr.ac.uk](http://www.jla.nihr.ac.uk)). Over 6000 responses  
53 were collated and voted upon to give a top 10 list of treatment uncertainties. Two of these top then  
54 uncertainties will be addressed with this systematic review:  
55  
56  
57  
58  
59  
60

- 1) What is the correct way to use antibiotics in acne to achieve the best outcomes with the least risk?
- 2) What management strategy should be adopted for the treatment of acne in order to optimise short and long-term outcomes?

In addition, five people comprising members of the public and patients with acne or their carers will attend a focus group to help write the summary which will be used to disseminate the results of this systematic review to the public.

## Ethics and dissemination

This systematic review protocol was registered on the 8<sup>th</sup> of April 2019 on the International Prospective Register of Systematic Reviews (PROSPERO). Any amendments to the protocol will be updated and published on the PROSPERO website with clear notes of where specific changes were made with detailed explanations of why. The results of this systematic review will be submitted for peer-review publication.

## References

1. Sterne JA HM, Reeves BC et al. ROBINS-I: a tool for assessing risk of bias in non-randomised studies of interventions. *BMJ*. 2016 Oct 12;355:i4919.
2. Organization. WH. Global action plan on antimicrobial resistance. . 2015
3. O'Neill J. Tackling Drug-Resistant Infections Globally: Final Report and Recommendations. The review on antimicrobial resistance May 2016
4. Bhate K, Williams HC. Epidemiology of acne vulgaris. *The British journal of dermatology*. 2013 Mar;168(3):474-85
5. Williams HC, Dellavalle RP, Garner S. Acne vulgaris. *Lancet (London, England)*. 2012 Jan 28;379(9813):361-72
6. Whitehouse HJ FE, El-Mansori I, Layton AM. . Oral antibiotics for acne: are we adopting premium use? Presentation at the Annual Conference of the British Association of Dermatologists, Birmingham, U.K. 5–7 July 2016.
7. Barbieri JS HO, Margolis DJ. Duration of oral tetracycline-class antibiotic therapy and use of topical retinoids for the treatment of acne among general practitioners (GP): A retrospective cohort study. *ournal of the American Academy of Dermatology*. 2016 Dec;75:1142-50
8. Lee YH LG, Thiboutot DM et al. A retrospective analysis of the duration of oral antibiotic therapy for the treatment of acne among adolescents: Investigating practice gaps and potential cost-savings. *Journal of the American Academy of Dermatology*. 2014;71
9. Whitehouse H.J. FE E-MIaLAM, . Conference Presentation: Oral antibiotics for acne: are we adopting premium use? (British Association of Dermatologists Annual Conference 2016. 2016
10. National Institute of Health and Care Excellence. Clinical Knowledge Summaries. Acne vulgaris. revised 2014.
11. Zaenglein AL PA, Schlosser BJ. Guidelines of care for the management of acne vulgaris. *J Am Acad Dermatol*. 2016;74:945-73 e33

12. Nast A DB, Bettoli V. European evidence-based (S3) guideline for the treatment of acne – update 2016 – short version. *Eur Acad Dermatol Venereol.* 2016;30:1261-8
13. Barbieri JS JW, Margolis DJ. Trends in prescribing behavior of systemic agents used in the treatment of acne among dermatologists and nondermatologists: A retrospective analysis, 2004-2013. *J Am Acad Dermatol.* 2017;77:456-63
14. Kuet K.H. FC FE, Eady A, and Layton A.M,. Conference Presentation: A decade later, has the prevalence of skin colonization by resistant propionibacteria increased in our patients with acne? British Association of Dermatologists Annual Conference. 2015
15. Lee SE KJ-M, Jeong SK. Protease-activated receptor-2 mediates the expression of inflammatory cytokines, antimicrobial peptides, and matrix metalloproteinases in keratinocytes in response to *Propionibacterium acnes*. *Arch Dermatol Res.* 2010;302:745-56
16. Bienenfeld A, Nagler AR, Orlow SJ. Oral Antibacterial Therapy for Acne Vulgaris: An Evidence-Based Review. *American journal of clinical dermatology.* 2017 Aug;18(4):469-90
17. Lawes T L-LJ, Nebot CA. Effects of national antibiotic stewardship and infection control strategies on hospital-associated and community-associated methicillin-resistant *Staphylococcus aureus* infections across a region of Scotland: a non-linear time-series study. *Lancet Infect Dis.* 2015;15:1438-49
18. Simpson SA WF, Butler CC. General practitioners' perceptions of antimicrobial resistance: a qualitative study. *The Journal of antimicrobial chemotherapy.* 2007;59:292-6
19. Sinnott SB, K; Margolis, DJ; Langan, SM. Antibiotics and acne: an emerging iceberg of antibiotic resistance? . *British Journal of Dermatology* 2016;175(6):1127-8
20. <http://prisma-statement.org/>.
21. Wells GA SB, O'Connell D, et al. . The Newcastle-Ottawa Scale (NOS) for assessing the quality of nonrandomised studies in meta-analyses. . [http://www.ohrca.com/programs/clinical\\_epidemiology/oxford.asp](http://www.ohrca.com/programs/clinical_epidemiology/oxford.asp) 2008
22. <https://methods.cochrane.org/risk-bias-20-tool>.
23. Ioannidis JP PN, Evangelou E. Uncertainty in heterogeneity estimates in meta-analyses. . *BMJ.* 2007;335:914-6
24. Egger M DSG, Schneider M, Minder C. Bias in meta-analysis detected by a simple, graphical test. *BMJ.* 1997 315:629-34



# BMJ Open

## Is there an association between long-term antibiotics for acne and subsequent infection sequelae and antimicrobial resistance? Systematic review protocol

|                                 |                                                                                                                                                                                                                                                                                                                                                                                                                                                                                                                                                                                                                                                                                                                                                                                                                                                                                                                                                                                                                                                                                                                                                                                                                                             |
|---------------------------------|---------------------------------------------------------------------------------------------------------------------------------------------------------------------------------------------------------------------------------------------------------------------------------------------------------------------------------------------------------------------------------------------------------------------------------------------------------------------------------------------------------------------------------------------------------------------------------------------------------------------------------------------------------------------------------------------------------------------------------------------------------------------------------------------------------------------------------------------------------------------------------------------------------------------------------------------------------------------------------------------------------------------------------------------------------------------------------------------------------------------------------------------------------------------------------------------------------------------------------------------|
| Journal:                        | <i>BMJ Open</i>                                                                                                                                                                                                                                                                                                                                                                                                                                                                                                                                                                                                                                                                                                                                                                                                                                                                                                                                                                                                                                                                                                                                                                                                                             |
| Manuscript ID                   | bmjopen-2019-033662.R1                                                                                                                                                                                                                                                                                                                                                                                                                                                                                                                                                                                                                                                                                                                                                                                                                                                                                                                                                                                                                                                                                                                                                                                                                      |
| Article Type:                   | Protocol                                                                                                                                                                                                                                                                                                                                                                                                                                                                                                                                                                                                                                                                                                                                                                                                                                                                                                                                                                                                                                                                                                                                                                                                                                    |
| Date Submitted by the Author:   | 03-Mar-2020                                                                                                                                                                                                                                                                                                                                                                                                                                                                                                                                                                                                                                                                                                                                                                                                                                                                                                                                                                                                                                                                                                                                                                                                                                 |
| Complete List of Authors:       | Bhate, Ketaki; London School of Hygiene and Tropical Medicine Faculty of Epidemiology and Population Health,<br>Lin, Liang-Yu; London School of Hygiene and Tropical Medicine Faculty of Epidemiology and Population Health, Department of Non-communicable Disease Epidemiology;<br>Barbieri, John; University of Pennsylvania, Perelman School of Medicine, Department of Dermatology<br>Leyrat, Clémence; London School of Hygiene and Tropical Medicine, Department of Medical Statistics<br>Hopkins, Susan; Public Health England<br>Stabler, Richard; London School of Hygiene and Tropical Medicine Faculty of Infectious and Tropical Diseases<br>Shallcross, Laura; University College London<br>Smeeth, Liam; London School of Hygiene and Tropical Medicine Faculty of Epidemiology and Population Health<br>Francis, Nick A.; Cardiff University<br>Mathur, Rohini; London School of Hygiene and Tropical Medicine, Department of Non-Communicable Disease Epidemiology; Queen Mary University of London, Centre for Primary Care & Public Health<br>Langan, Sinead; London School of Hygiene and Tropical Medicine<br>Sinnott, Sarah-Jo; London School of Hygiene and Tropical Medicine, Non-communicable disease epidemiology |
| <b>Primary Subject Heading</b>: | Dermatology                                                                                                                                                                                                                                                                                                                                                                                                                                                                                                                                                                                                                                                                                                                                                                                                                                                                                                                                                                                                                                                                                                                                                                                                                                 |
| Secondary Subject Heading:      | Dermatology, Epidemiology                                                                                                                                                                                                                                                                                                                                                                                                                                                                                                                                                                                                                                                                                                                                                                                                                                                                                                                                                                                                                                                                                                                                                                                                                   |
| Keywords:                       | Acne < DERMATOLOGY, antimicrobial resistance, EPIDEMIOLOGY, Dermatological epidemiology < DERMATOLOGY                                                                                                                                                                                                                                                                                                                                                                                                                                                                                                                                                                                                                                                                                                                                                                                                                                                                                                                                                                                                                                                                                                                                       |
|                                 |                                                                                                                                                                                                                                                                                                                                                                                                                                                                                                                                                                                                                                                                                                                                                                                                                                                                                                                                                                                                                                                                                                                                                                                                                                             |

SCHOLARONE™  
Manuscripts

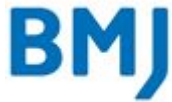

I, the Submitting Author has the right to grant and does grant on behalf of all authors of the Work (as defined in the below author licence), an exclusive licence and/or a non-exclusive licence for contributions from authors who are: i) UK Crown employees; ii) where BMJ has agreed a CC-BY licence shall apply, and/or iii) in accordance with the terms applicable for US Federal Government officers or employees acting as part of their official duties; on a worldwide, perpetual, irrevocable, royalty-free basis to BMJ Publishing Group Ltd ("BMJ") its licensees and where the relevant Journal is co-owned by BMJ to the co-owners of the Journal, to publish the Work in this journal and any other BMJ products and to exploit all rights, as set out in our [licence](#).

The Submitting Author accepts and understands that any supply made under these terms is made by BMJ to the Submitting Author unless you are acting as an employee on behalf of your employer or a postgraduate student of an affiliated institution which is paying any applicable article publishing charge ("APC") for Open Access articles. Where the Submitting Author wishes to make the Work available on an Open Access basis (and intends to pay the relevant APC), the terms of reuse of such Open Access shall be governed by a Creative Commons licence – details of these licences and which [Creative Commons](#) licence will apply to this Work are set out in our licence referred to above.

Other than as permitted in any relevant BMJ Author's Self Archiving Policies, I confirm this Work has not been accepted for publication elsewhere, is not being considered for publication elsewhere and does not duplicate material already published. I confirm all authors consent to publication of this Work and authorise the granting of this licence.

# 1 BMJ PROTOCOL

## 2 Title

3 Is there an association between long-term antibiotics for acne and subsequent infection sequelae  
4 and antimicrobial resistance? Systematic review protocol

## 6 Authors

7 Dr Ketaki Bhate<sup>1</sup> [Ketaki.bhate@lshtm.ac.uk](mailto:Ketaki.bhate@lshtm.ac.uk) <https://orcid.org/0000-0001-5509-4428>

8 Dr Liang-Yu Lin<sup>1</sup> [liang-yu.lin@lshtm.ac.uk](mailto:liang-yu.lin@lshtm.ac.uk) <https://orcid.org/0000-0003-4720-6738>

9 Dr John Barbieri<sup>2</sup> [john.barbieri@uphs.upenn.edu](mailto:john.barbieri@uphs.upenn.edu) <https://orcid.org/0000-0002-5467-4102>

10 Dr Clemence Leyrat<sup>1</sup> [clemence.leyrat@lshtm.ac.uk](mailto:clemence.leyrat@lshtm.ac.uk) <https://orcid.org/0000-0002-4097-4577>

11 Dr Susan Hopkins<sup>3</sup> [susan.hopkins@phe.gov.uk](mailto:susan.hopkins@phe.gov.uk) <https://orcid.org/0000-0001-5179-5702>

12 Dr Richard Stabler<sup>4</sup> [Richard.stabler@lshtm.ac.uk](mailto:Richard.stabler@lshtm.ac.uk) <https://orcid.org/0000-0002-2402-6630>

13 Dr Laura Shallcross<sup>5</sup> [l.shallcross@ucl.ac.uk](mailto:l.shallcross@ucl.ac.uk) <https://orcid.org/0000-0003-1713-2555>

14 Professor Liam Smeeth<sup>1</sup> [liam.smeeth@lshtm.ac.uk](mailto:liam.smeeth@lshtm.ac.uk) <https://orcid.org/0000-0002-9168-6022>

15 Professor Nick Francis<sup>6</sup> [francisna@cardiff.ac.uk](mailto:francisna@cardiff.ac.uk) <https://orcid.org/0000-0001-8939-7312>

16 Dr Rohini Mathur<sup>1</sup> [rohini.mathur@lshtm.ac.uk](mailto:rohini.mathur@lshtm.ac.uk) <https://orcid.org/0000-0002-3817-8790>

17 Professor Sinéad Langan<sup>1\*</sup> [sinead.langan@lshtm.ac.uk](mailto:sinead.langan@lshtm.ac.uk) <https://orcid.org/0000-0002-7022-7441>

18 Dr Sarah-Jo Sinnott<sup>1\*</sup> [sarah-jo.sinnott@lshtm.ac.uk](mailto:sarah-jo.sinnott@lshtm.ac.uk) <https://orcid.org/0000-0001-7586-686X>

19 \*Senior authors

## 20 Author affiliations

- 21 1. Faculty of Epidemiology and Population Health, London School of Hygiene and Tropical Medicine,  
22 Keppel Street, London.
- 23 2. University of Pennsylvania, Perelman School of Medicine, Philadelphia.
- 24 3. AMR Division, Public Health England.
- 25 4. Faculty of Infectious and Tropical Diseases, London School of Hygiene and Tropical Medicine, Keppel  
26 Street, London.

- 1  
2  
3 1 5. Faculty of Population Health Sciences, University College London.  
4 2 6. School of Primary Care, Population Sciences and Medical Education, University of Southampton.

5  
6  
7 3  
8  
9 4 Correspondence to: Dr Ketaki Bhate

10  
11 5 London School of Hygiene and Tropical Medicine, Keppel Street, WC1E 7HT

12  
13  
14 6 [Ketaki.bhate@lshtm.ac.uk](mailto:Ketaki.bhate@lshtm.ac.uk)  
15  
16  
17 7

18  
19 8 **Word count**

20  
21 9 2060  
22

23  
24 10 **Keywords**

25  
26 11 Acne vulgaris, antibiotic, antimicrobial resistance, tetracycline, macrolide, dihydrofolate reductase  
27 12 inhibitor  
28  
29  
30 13

31  
32 14 **Author contributions**

33  
34 15 Ketaki Bhate wrote the protocol. Sinéad Langan, Sarah-Jo Sinnott and Rohini Mathur supervised the  
35 16 writing process and contributed equally. Ling-Yu Lin, John Barbieri, Clemence Leyrat, Richard Stabler,  
36 17 Laura Shallcross, Susan Hopkins, Nick Francis and Liam Smeeth form an advisory group and reviewed  
37 18 the protocol.  
38  
39  
40  
41  
42 19

43  
44 20 **Funding statement**

45  
46  
47 21 Ketaki Bhate is funded by an NIHR Doctoral Research Fellowship DRF-2018-11-ST2-066.  
48  
49

50 22 Professor Sinéad Langan is funded by a Wellcome Trust Senior Clinical Fellowship (205039/Z/16/Z).  
51

52  
53 23 Dr. Barbieri is supported by the National Institute of Arthritis and Musculoskeletal and Skin Diseases  
54 24 of the National Institutes of Health under award number T32-AR-007465.  
55

56  
57 25 Dr Laura Shallcross is funded by an NIHR Clinician Scientist Award CS-2016-16-007  
58  
59

60 26 **Disclaimer:**

1  
2  
3 1 The views expressed are those of the author(s) and not necessarily those of the NHS, the NIHR or the  
4  
5 2 Department of Health and Social Care.  
6  
7  
8 3  
9

10 4 **Competing interests**  
11

12 5 Dr. Barbieri is supported by the National Institute of Arthritis and Musculoskeletal and Skin  
13 6 Diseases of the National Institutes of Health under award number T32-AR-007465 and  
14 7 receives partial salary support through a Pfizer Fellowship grant to the Trustees of the  
15 8 University of Pennsylvania.  
16 9  
17  
18  
19  
20 10  
21  
22  
23  
24  
25  
26  
27  
28  
29  
30  
31  
32  
33  
34  
35  
36  
37  
38  
39  
40  
41  
42  
43  
44  
45  
46  
47  
48  
49  
50  
51  
52  
53  
54  
55  
56  
57  
58  
59  
60

For peer review only

## 1 ABSTRACT:

### 2 Introduction

3 Antimicrobial resistance (AMR) is a global health emergency. Acne vulgaris is a highly prevalent  
4 condition, and the dominant role antibiotics play in its treatment is a major concern. Antibiotics are  
5 widely used in the treatment of acne predominantly for their anti-inflammatory effect, hence their  
6 use in acne may not be optimal. Tetracyclines and macrolides are the two most common oral  
7 antibiotics classes prescribed, and average use can extend from –a few months to several years of  
8 intermittent or continuous use. This overall aim of this systematic review is to elucidate what is  
9 known about oral antibiotics for acne contributing to antibiotic treatment failure and AMR.

### 11 Methods and Analysis

12 A systematic review will be conducted to address the question: What is the existing evidence that  
13 long-term oral antibiotics used to treat acne in those over 8 years of age contribute towards  
14 antibiotic treatment failure or other outcomes suggestive of the impact of AMR? We will search the  
15 following databases: Embase, MEDLINE, the Cochrane library and Web of Science. Search terms will  
16 be developed in collaboration with a librarian by identifying keywords from relevant articles and by  
17 undertaking pilot searches. Randomised-control trials, cohort and case-controlled studies conducted  
18 in any health care setting and published in any language will be included. The searches will be re-run  
19 prior to final analyses to capture the recent literature. The Cochrane tool for bias assessment in  
20 randomised trials and ROBINS-I for the assessment of bias in non-randomised studies will be used to  
21 assess the risk of bias of included studies. GRADE will be used to make an overall assessment of the  
22 quality of evidence. A meta-analysis will be undertaken of the outcome measures if the individual  
23 studies are sufficiently homogenous. If a meta-analysis is not possible, a qualitative assessment will  
24 be presented as a narrative review.

### 26 Ethics and dissemination

27 Ethical approval is not required for this systematic-review. The results will be published in a peer-  
28 reviewed journal and any deviations from the protocol will be clearly documented in the published  
29 manuscript of the full systematic-review.

### 30 Prospero registration number

31 CRD42019121738.

## Strengths and limitations of this study

- To our knowledge, this is the first comprehensive systematic review that will address the use of oral antibiotics for acne and their contribution to antimicrobial resistance
- Screening, data extraction and quality assessment will be undertaken independently by three medically qualified researchers with training in systematic review methodology, thereby ensuring scientific rigour, transparency and repeatability
- There are no date or language restrictions; however, this systematic review does not examine the grey literature

For peer review only

## 1 Introduction

2 The future effectiveness of antibiotics is in jeopardy with the World Health Organisation declaring  
3 the threat of Antimicrobial Resistance (AMR) a most urgent crisis. <sup>1</sup> Future deaths from infections as  
4 a result of AMR without any intervention is estimated at 10 million per year and by 2050, the cost of  
5 AMR could reach 100 trillion USD.<sup>2</sup>

6 Topical and oral antibiotics are commonly prescribed for the treatment of acne vulgaris, a chronic  
7 skin disorder with onset predominantly in adolescence. Given the psychosocial consequences and  
8 potential for permanent disfigurement with scarring, it is imperative that people with acne receive  
9 effective treatment.<sup>3, 4</sup> Prevalence studies show that 80-100% of teenagers have acne and that 20%  
10 are moderately to severely affected. The high prevalence means that both topical and oral  
11 antibiotics are used in a large proportion of the adolescent population and for variable durations  
12 ranging from 6 weeks to many months, and in some cases, several years.<sup>5, 6</sup> Differences between  
13 international guidelines regarding duration of treatment is one of the reasons that antibiotics for  
14 acne are used for significantly longer than recommended as there is uncertainty about the optimal  
15 duration of treatment.<sup>6-11</sup> Tetracyclines and macrolides are the two of the most common oral  
16 antibiotic classes prescribed for acne with varying durations of average use depending on treatment  
17 setting and between different countries.<sup>6, 12</sup>

18 The overuse of antibiotics is a known cause of AMR as repeated and sustained exposure allows  
19 microbes to develop mechanisms to avoid the effects of the drugs designed to treat them and allows  
20 selection in favour of bystander or commensal bacteria with resistance subsequently cause invasive  
21 infection. Acne is aetiologically multifactorial, we already know that some strains of *Cutibacterium*  
22 *acnes* (formally *Propionibacterium acnes*), the bacteria pathophysiologically associated with acne,  
23 are now resistant to commonly used antibiotics in acne, making their initial use as anti-microbial  
24 agents futile.<sup>13, 14</sup> However, we do not know how these long-term antibiotics for acne may attenuate  
25 microbiota elsewhere at other body sites, and the ability of other bacteria at other infective sites to  
26 withstand the effect of antibiotics. Despite this, the anti-inflammatory effect and proven efficacy of  
27 antibiotics in treating acne ensures their continued use<sup>15</sup>, albeit their effects may not be sustained.  
28 Considering the relationship between long term exposure to antibiotics and AMR, this practice may  
29 not be optimal.

30 The effects long-term antibiotics for acne have on future infections caused by resistant organisms,  
31 subsequent antibiotic treatment failure or the rate of infections (or any other measures which may  
32 indicate antimicrobial resistance) and how long any effect may last, is not yet known and has not  
33 been systematically reviewed in the literature before. While antibiotic stewardship programmes



1  
2  
3 1 have been shown to be effective<sup>16</sup> in other settings, to ensure their successful execution, robust  
4 2 evidence must be generated to show that using antibiotics in the treatment of acne has important  
5 3 implications for future infective episodes and resistance sequelae. Until there is evidence of how the  
6 4 use of oral antibiotics for acne may cause AMR, changing current practice will be challenging.<sup>17</sup>  
7  
8  
9

10 5 Given the global health emergency of AMR and the dominant role antibiotics play in the treatment  
11 6 of acne – a highly prevalent and ubiquitous skin condition worldwide, there is a clearly defined  
12 7 evidence gap which needs to be urgently addressed.<sup>18</sup> This systematic review aims to establish what  
13 8 is already known about resistance sequelae for those with acne who are treated with long-term  
14 9 topical or oral antibiotics.<sup>19</sup>  
15  
16  
17  
18  
19  
20  
21

## 22 11 **Methods and Analysis**

### 23 12 **Literature search strategy**

24 13 We will search the following databases; Embase, Medline, Cochrane and Web of Science. We will  
25 14 develop search terms by identifying keywords from relevant articles and by undertaking pilot  
26 15 searches to identify index or Mesh terms. We will modify the search terms according to each  
27 16 database e.g. the MeSH terms in Medline and Emtree terms in Embase. Searches will be undertaken  
28 17 by the lead author who has medical and search training in collaboration with a librarian. Search  
29 18 strategies will be reviewed by all authors. The searches will be kept as broad as possible for example,  
30 19 by using the ‘explode’ function on the Ovid platform to maximise the number of relevant articles.  
31 20 The search strategy is available to view in the accompanying supplement (supplementary file 1).  
32 21 Searches were undertaken on the 19<sup>th</sup> of July 2019 and date back to inception of the databases.  
33  
34  
35  
36  
37  
38  
39  
40  
41  
42  
43  
44

### 45 23 **Eligibility criteria**

#### 46 24 **Inclusion criteria:**

- 47 25 • To address the question, the following inclusion criteria will apply:
  - 48 26 ○ **Population:** A study population including participants aged over the age of 8 in any  
49 27 healthcare setting with acne vulgaris.
  - 50 28 • Original studies will be eligible for assessment for inclusion if they address the specific  
51 29 research question.
  - 52 30 • Randomised controlled trials (of any trial design).
  - 53 31 • Observational studies limited to cohort and case-control studies.

- 1  
2  
3 1 • We will include conference abstracts if the full paper is unpublished and can be obtained  
4 2 from the authors.  
5  
6  
7  
8 3  
9

10 4 **Exclusion criteria:**

- 11  
12 5 • Ecological studies and studies that do not assess temporality such as case-series and case  
13 6 reports.  
14  
15 7 • We will exclude, unpublished studies, ongoing studies and the grey literature.  
16  
17 8 • In addition studies which only look at antimicrobial resistance in *Propionibacterium acnes* or  
18 9 *P. acnes* or *Cutibacterium acnes* *C. acnes*).  
19  
20 10 • Studies including people who are under the age of 8 exclusively will be excluded. The age of  
21 11 8 was chosen as acne vulgaris is unlikely to present in younger children and in addition,  
22 12 tetracyclines are not recommended in younger children – the BNF recommends tetracyclines  
23 13 are given to children aged 12 years and above.  
24  
25 14 • Studies including people who are treated with antibiotics for other acne subtypes e.g.  
26 15 hidradenitis suppurativa or drug induced acne.  
27  
28  
29  
30  
31  
32 16  
33

34 17 **Exposure**

35  
36 18 At least 28 days of continuous (daily doses) oral antibiotics for acne vulgaris, the duration helping  
37 19 ensure treatment is not targeted at an acute infective episode and in addition, 28 days is the  
38 20 minimum duration a prescription will be issued for an antibiotic treatment of acne. The exposure is  
39 21 likely to include commonly used antibiotic classes – tetracyclines, macrolides and dihydrofolate  
40 22 reductase inhibitors, however there will be no limits placed on the antibiotic class used to treat  
41 23 acne. We have excluded the use of topical antibiotics as these are less likely to have an effect at  
42 24 sites other than the skin to where they are applied.  
43  
44  
45  
46  
47  
48  
49 25  
50

51 26 **Comparator**

52  
53 27 No exposure to long-term oral antibiotics within an acne population or within a general population.  
54  
55

56 28 **Outcome**

57  
58 29 The primary outcome is antibiotic treatment failure or any infection caused by a resistant organism.  
59 30 The secondary outcome is the detection of resistant organisms without a clinical infection, rate of  
60

1  
2  
3 1 infection or changes to the microbiota profile e.g. with the colonisation of resistant microbiota  
4 without a clinical infection, or different microbiota in a sampled site compared to baseline prior to  
5 2 having received a long-term antibiotic for acne. Any measure (including proxy measures) will be  
6 3 included, for example, laboratory measures (such as an elevated C-reactive Protein or positive  
7 4 culture in the case of an infection at any body site), patient observations (such as an elevated  
8 5 temperature and/or pulse rate which may indicate an infective process) or proxy measures that may  
9 6 have been used in epidemiological studies, for example, difficult to treat infections which may  
10 7 indicate a resistant infection. Each outcome will be assessed separately. The outcome can occur at  
11 8 any time point after at least 28 days of continuous oral antibiotic exposure for acne; we will stratify  
12 9 according to length of follow up, e.g. up to 6 months, 6 months to 1 year, 1-2 years etc.  
13  
14  
15  
16  
17  
18  
19  
20  
21  
22

### 23 **Potential confounding variables/ effect modifiers**

24  
25 13 Confounding factors that may be considered by studies investigating treatment failure or AMR as a  
26 14 result of long-term antibiotics for acne are: age, sex, socioeconomic status, treatment adherence,  
27 15 medical conditions such as primary immunodeficiency, diabetes, asthma, cancer requiring  
28 16 immunosuppressive medication, recent hospitalization within the last 6 months, repeated  
29 17 admissions to hospital, any recurrent infections, other prescribed medication in particular  
30 18 immunosuppressive therapy including oral corticosteroids, smoking, alcohol use and ethnicity. We  
31 19 will also explore for effect modification. The inclusion of these confounding factors will be  
32 20 acknowledged in the bias assessment of each study along with a statement of the direction and  
33 21 magnitude of bias their omission may be associated with.  
34  
35  
36  
37  
38  
39  
40

### 41 **Eligibility assessment and data extraction**

42  
43 23 **Phase 1:** Covidence, an online literature review data management programme will be used to  
44 24 facilitate the systematic review process, inclusive of title and abstract screening, full paper retrieval  
45 25 and storage and decisions on which papers to include at full text review. In the first phase, all titles  
46 26 and abstracts will be uploaded to Covidence. Duplicates will then be removed by the lead reviewer  
47 27 (KB). Three reviewers, KB, LYL and JB will then independently screen the search results based on title  
48 28 and abstract. Each title/abstract will require two votes. Consensus will be achieved on the number of  
49 29 titles and abstracts to include in the full study review. Any disputes will be resolved by the  
50 30 involvement of a 4th reviewer, SML.  
51  
52  
53  
54  
55  
56

57 31 **Phase 2:** Full text papers will be assessed independently by the reviewer pairs using a standardised  
58 32 data extraction form. The extraction tool will be piloted using the first 3 included records, after  
59  
60

1  
2  
3 1 which modifications may be made following discussion with other members of the review team. The  
4 2 quality of the studies will be scored using assessment tools and free text explanations for the score  
5 3 given will be included on the score sheet. Any disagreements will be discussed by the three  
6 4 reviewers (KB, LYL and JB) and in instances of disagreement, a 4th reviewer (SML) will make a final  
7 5 decision. If ambiguity still remains after the full text is obtained, the study authors will be contacted  
8 6 for further clarification.

#### 7 Data items

8 Three data domains will be extracted:

##### 9 Data relating to study design

10 Author, country, specific study design, the year the study was conducted or the years over which the  
11 data were collected. Healthcare setting, the number of study participants, the ages of the  
12 participants, the gender balance will be collected for the whole population under study, including  
13 the comparator group. If the study is a trial, then specifics of the study design such as randomisation,  
14 allocation concealment and blinding will be noted.

##### 15 Data relating to exposure

16 The dose, frequency and antibiotic used, the median/mean length of treatment of acne with the  
17 antibiotic, the definition of long-term treatment with antibiotics used in the study, the number of  
18 participants exposed to antibiotics and if multiple courses are prescribed, the length of time  
19 between antibiotic courses and the intervention applied to comparators.

##### 21 Data relating to outcomes

22 The measure of antibiotic treatment failure or AMR and the degree of antibiotic treatment failure or  
23 AMR, e.g. repeat course required, hospitalisation or death. The length of follow up will be stratified.

#### 25 **Study quality assessment**

26 Each study will be critically appraised by reviewers. The Cochrane tool for bias assessment in  
27 randomised studies and the ROBINS-I tool for the assessment of bias in non-randomised studies will  
28 be used to assess the risk of bias in included studies.<sup>20-22</sup> GRADE will be used to make an overall  
29 assessment of the quality of evidence.<sup>22</sup> Pairs of reviewers will make independent assessments of  
30 the risk of bias. Markers of bias depending on study design included in the aforementioned scoring

1  
2  
3 1 tools will include factors such as the method of participant selection, follow up, randomisation,  
4 2 adjustment for confounding and measurement error of exposures or outcomes. If a proportion of  
5 3 studies have a high risk of bias found using the scoring tool, we will do a sensitivity analysis excluding  
6 4 them.  
7  
8  
9

### 10 5 11 12 13 6 **Data synthesis/ statistical analysis** 14

15 7 We will analyse interventional and observational studies separately. If there is homogeneity across  
16 8 studies and a meta-analysis is possible, we will generate a pooled effect estimate for those exposed  
17 9 to long-term antibiotics and those unexposed within each category of study design. If there are a  
18 10 sufficient number of studies, subgroup analyses will be undertaken for example, by class of antibiotic  
19 11 and antibiotic treatment duration. The  $I^2$  statistic will be used to assess heterogeneity.<sup>23</sup> Sources of  
20 12 heterogeneity may include methodology, age of participants, study duration, the confounding  
21 13 factors considered, the exposure (i.e. length/duration, the class of antibiotic), the comparators and  
22 14 the outcomes measured. If heterogeneity is above 50% we will not undertake a meta-analysis. If  
23 15 studies are sufficiently homogenous with regard to exposures, comparators and outcomes, a  
24 16 random effects model will be used to generate a pooled relative risk and its 95% confidence interval.  
25 17 Study characteristics and the effect estimate for the association between antibiotics for acne and  
26 18 the specific measure of AMR will be clearly presented. We will also do a sensitivity analysis using a  
27 19 fixed effects model. Publication bias will be assessed using Funnel plots and Egger tests.<sup>24</sup> Forest  
28 20 plots will be presented. All statistical analyses will be performed using Stata. If quantitative synthesis  
29 21 is not possible due to heterogeneity, we will conduct a narrative synthesis. We will also study each  
30 22 category of outcome measure separately: e.g. laboratory-based measures of resistance or outcome  
31 23 measures thought to be proxies for AMR using routinely collected health records. Given the breadth  
32 24 of outlined outcomes, it is likely that the evidence obtained will be diverse. An overall description of  
33 25 the strength of the body of evidence generated using GRADE will be described.<sup>21</sup>  
34  
35  
36  
37  
38  
39  
40  
41  
42  
43  
44  
45  
46  
47

48 26 The study will be reported following PRISMA guidance.<sup>19</sup>  
49

### 50 27 **Patient and Public involvement** 51

52 28 This systematic review has been informed by the results of the acne Priority Setting Partnership  
53 29 (PSP) (acnepsp.org) in collaboration with the James Lind Alliance ([www.jla.nihr.ac.uk](http://www.jla.nihr.ac.uk)). Over 6000  
54 30 responses were collated and voted upon to give a top 10 list of treatment uncertainties. Two of  
55 31 these top ten uncertainties will be addressed with this systematic review:  
56  
57  
58  
59  
60

- 1  
2  
3 1 1) What is the correct way to use antibiotics in acne to achieve the best outcomes with the  
4 least risk?  
5 2  
6 3 2) What management strategy should be adopted for the treatment of acne in order to  
7 optimise short and long-term outcomes?  
8 4  
9

10 5 In addition, five people comprising members of the public and patients with acne or their carers will  
11 attend a focus group to help write the summary which will be used to disseminate the results of this  
12 systematic review to the public.  
13 6  
14 7  
15

16 8

## 19 9 **Ethics and dissemination**

20  
21 10 As this is a systematic review, ethical approval was not required. This systematic review protocol was  
22 registered on the 8<sup>th</sup> of April 2019 on the International Prospective Register of Systematic Reviews  
23 (PROSPERO). Any amendments to the protocol will be updated and published on the PROSPERO  
24 website with clear notes of where specific changes were made with detailed explanations of why.  
25 12  
26 13  
27 14 The results of this systematic review will be submitted for peer-review publication.  
28  
29  
30  
31  
32

## 33 16 **References**

- 34 17 1. World Health Organization. Global action plan on antimicrobial resistance. 2015  
35 18 2. O'Neill J. Tackling Drug-Resistant Infections Globally: Final Report and Recommendations.  
36 19 The review on antimicrobial resistance May 2016  
37 20 3. Bhate K, Williams HC. Epidemiology of acne vulgaris. *The British journal of dermatology*.  
38 21 2013 Mar;168(3):474-85  
39 22 4. Williams HC, Dellavalle RP, Garner S. Acne vulgaris. *Lancet (London, England)*. 2012 Jan  
40 23 28;379(9813):361-72  
41 24 5. Whitehouse HJ FE, El-Mansori I, Layton AM. . Oral antibiotics for acne: are we adopting  
42 25 premium use? Presentation at the Annual Conference of the British Association of Dermatologists,  
43 26 Birmingham, U.K. 5–7 July 2016.  
44 27 6. Barbieri JS HO, Margolis DJ. Duration of oral tetracycline-class antibiotic therapy and use of  
45 28 topical retinoids for the treatment of acne among general practitioners (GP): A retrospective cohort  
46 29 study. *ournal of the American Academy of Dermatology*. 2016 Dec;75:1142-50  
47 30 7. Lee YH LG, Thiboutot DM et al. A retrospective analysis of the duration of oral antibiotic  
48 31 therapy for the treatment of acne among adolescents: Investigating practice gaps and potential cost-  
49 32 savings. *Journal of the American Academy of Dermatology*. 2014;71  
50 33 8. Whitehouse H.J. FE E-MIaLAM, . Conference Presentation: Oral antibiotics for acne: are we  
51 34 adopting premium use? (British Association of Dermatologists Annual Conference 2016. 2016  
52 35 9. National Institute of Health and Care Excellence. Clinical Knowledge Summaries. Acne  
53 36 vulgaris. revised 2014.  
54 37 10. Zaenglein AL PA, Schlosser BJ. Guidelines of care for the management of acne vulgaris. *J Am*  
55 38 *Acad Dermatol*. 2016;74:945-73 e33  
56 39 11. Nast A DB, Bettoli V. European evidence-based (S3) guideline for the treatment of acne –  
57 40 update 2016 – short version. *Eur Acad Dermatol Venereol*. 2016;30:1261-8

- 1  
2  
3  
4  
5  
6  
7  
8  
9  
10  
11  
12  
13  
14  
15  
16  
17  
18  
19  
20  
21  
22  
23  
24  
25  
26  
27  
28  
29  
30  
31  
32  
33  
34  
35  
36  
37  
38  
39  
40  
41  
42  
43  
44  
45  
46  
47  
48  
49  
50  
51  
52  
53  
54  
55  
56  
57  
58  
59  
60
12. Barbieri JS JW, Margolis DJ. Trends in prescribing behavior of systemic agents used in the treatment of acne among dermatologists and nondermatologists: A retrospective analysis, 2004-2013. *J Am Acad Dermatol*. 2017;77:456-63
  13. Kuet K.H. FC FE, Eady A, and Layton A.M,. Conference Presentation: A decade later, has the prevalence of skin colonization by resistant propionibacteria increased in our patients with acne? British Association of Dermatologists Annual Conference. 2015
  14. Lee SE KJ-M, Jeong SK. Protease-activated receptor-2 mediates the expression of inflammatory cytokines, antimicrobial peptides, and matrix metalloproteinases in keratinocytes in response to *Propionibacterium acnes*. *Arch Dermatol Res*. 2010;302:745-56
  15. Bienenfeld A, Nagler AR, Orlow SJ. Oral Antibacterial Therapy for Acne Vulgaris: An Evidence-Based Review. *American journal of clinical dermatology*. 2017 Aug;18(4):469-90
  16. Lawes T L-LJ, Nebot CA. Effects of national antibiotic stewardship and infection control strategies on hospital-associated and community-associated methicillin-resistant *Staphylococcus aureus* infections across a region of Scotland: a non-linear time-series study. *Lancet Infect Dis*. 2015;15:1438-49
  17. Simpson SA WF, Butler CC. General practitioners' perceptions of antimicrobial resistance: a qualitative study. *The Journal of antimicrobial chemotherapy*. 2007;59:292-6
  18. Sinnott SB, K; Margolis, DJ; Langan, SM. Antibiotics and acne: an emerging iceberg of antibiotic resistance? . *British Journal of Dermatology* 2016;175(6):1127-8
  19. <http://prisma-statement.org/>.
  20. Wells GA SB, O'Connell D, et al. . The Newcastle-Ottawa Scale (NOS) for assessing the quality of nonrandomised studies in meta-analyses. . [http://www.ohrca.com/programs/clinical\\_epidemiology/oxfordasp](http://www.ohrca.com/programs/clinical_epidemiology/oxfordasp) 2008
  21. <https://methods.cochrane.org/risk-bias-20-tool>.
  22. Sterne JA HM, Reeves BC et al. ROBINS-I: a tool for assessing risk of bias in non-randomised studies of interventions. *BMJ*. 2016 Oct 12;355:i4919.
  23. Ioannidis JP PN, Evangelou E. Uncertainty in heterogeneity estimates in meta-analyses. . *BMJ*. 2007;335:914-6
  24. Egger M DSG, Schneider M, Minder C. Bias in meta-analysis detected by a simple, graphical test. *BMJ*. 1997 315:629-34

Database: Ovid MEDLINE(R) and Epub Ahead of Print, In-Process & Other Non-Indexed Citations, Daily and Versions(R) <1946 to June 21, 2019>

Search Strategy:

-----

- 1 acne.mp. (17491)
- 2 exp Acne Vulgaris/ (11259)
- 3 1 or 2 (17491)
- 4 antibiotic\*.mp. (355427)
- 5 exp Antibiotic Prophylaxis/ (13110)
- 6 exp Anti-Bacterial Agents/ (700080)
- 7 tetracycline\*.mp. (45045)
- 8 exp Tetracycline/ (19631)
- 9 exp Tetracyclines/ (46884)
- 10 lymecycline\*.mp. (168)
- 11 exp Lymecycline/ (119)
- 12 minocycline\*.mp. (8527)
- 13 exp Minocycline/ (5724)
- 14 doxycycline\*.mp. (16071)
- 15 exp Doxycycline/ (9287)
- 16 oxytetracycline\*.mp. (8262)
- 17 exp Oxytetracycline/ (6279)
- 18 macrolide\*.mp. (22555)
- 19 Macrolides/ (11795)
- 20 exp Erythromycin/ (24397)
- 21 erythromycin\*.mp. (25510)
- 22 clarithromycin\*.mp. (10167)
- 23 exp Clarithromycin/ (6062)
- 24 azithromycin\*.mp. (8538)
- 25 exp Azithromycin/ (4820)
- 26 dihydrofolate reductase inhibitor\*.mp. (346)
- 27 exp Folic Acid Antagonists/ (57013)
- 28 trimethoprim\*.mp. (21485)
- 29 exp Trimethoprim/ (11693)
- 30 exp Trimethoprim, Sulfamethoxazole Drug Combination/ (6696)
- 31 penicillin\*.mp. (82869)
- 32 exp Penicillin-Binding Proteins/ (3293)
- 33 exp Penicillin G/ (38077)
- 34 cephalosporin\*.mp. (32358)
- 35 exp Cephalosporins/ (41273)
- 36 exp beta-Lactamases/ (22172)
- 37 fluoroquinolone\*.mp. (22199)
- 38 exp Fluoroquinolones/ (31393)
- 39 exp Ciprofloxacin/ (12824)
- 40 aminoglycoside\*.mp. (23235)
- 41 exp Aminoglycosides/ (151256)
- 42 exp Gentamicins/ (18634)
- 43 antimicrobial\*.mp. (154537)
- 44 exp Antimicrobial Stewardship/ (725)
- 45 exp Disk Diffusion Antimicrobial Tests/ (1536)
- 46 4 or 5 or 6 or 7 or 8 or 9 or 10 or 11 or 12 or 13 or 14 or 15 or 16 or 17 or 18 or 19 or 20



1  
2  
3 or 21 or 22 or 23 or 24 or 25 or 26 or 27 or 28 or 29 or 30 or 31 or 32 or 33 or 34 or 35 or 36 or  
4 37 or 38 or 39 or 40 or 41 or 42 or 43 or 44 or 45 (1080981)  
5 47 resistance\*.mp. (827828)  
6 48 exp beta-Lactam Resistance/ (26155)  
7 49 exp Drug Resistance, Microbial/ or exp Microbial Sensitivity Tests/ (231349)  
8 50 exp Drug Resistance, Multiple/ (33795)  
9 51 exp Drug Resistance, Bacterial/ (83040)  
10 52 exp Methicillin Resistance/ (10188)  
11 53 exp Multidrug Resistance-Associated Proteins/ (14320)  
12 54 exp Vancomycin Resistance/ (3263)  
13 55 47 or 48 or 49 or 50 or 51 or 52 or 53 or 54 (900383)  
14 56 43 or 44 [antimicrobial altogether] (154537)  
15 57 55 and 56 [antimicrobial AND resistance] (70921)  
16 58 46 and 55 [antibiotic AND resistance] (248811)  
17 59 infect\*.mp. (2131927)  
18 60 exp Escherichia coli/ (270735)  
19 61 exp Bacteriophages/ (56525)  
20 62 exp Infection/ (760393)  
21 63 infection\*.mp. (1804659)  
22 64 59 or 60 or 61 or 62 [infection altogether] (2649927)  
23 65 55 or 57 or 58 [resistance OR antimicrobial resistance OR antibiotic resistance] (900383)  
24 66 64 or 65 [infection OR resistance altogether] (3306493)  
25 67 3 and 66 [combined with acne] (3142)  
26  
27  
28  
29  
30  
31  
32  
33  
34  
35  
36  
37  
38  
39  
40  
41  
42  
43  
44  
45  
46  
47  
48  
49  
50  
51  
52  
53  
54  
55  
56  
57  
58  
59  
60

## PRISMA-P 2015 Checklist

This checklist has been adapted for use with protocol submissions to *Systematic Reviews* from Table 3 in Moher D et al: Preferred reporting items for systematic review and meta-analysis protocols (PRISMA-P) 2015 statement. *Systematic Reviews* 2015 4:1

| Section/topic                     | #  | Checklist item                                                                                                                                                                                  | Information reported                |                          | Line number(s) |
|-----------------------------------|----|-------------------------------------------------------------------------------------------------------------------------------------------------------------------------------------------------|-------------------------------------|--------------------------|----------------|
|                                   |    |                                                                                                                                                                                                 | Yes                                 | No                       |                |
| <b>ADMINISTRATIVE INFORMATION</b> |    |                                                                                                                                                                                                 |                                     |                          |                |
| <b>Title</b>                      |    |                                                                                                                                                                                                 |                                     |                          |                |
| Identification                    | 1a | Identify the report as a protocol of a systematic review                                                                                                                                        | <input checked="" type="checkbox"/> | <input type="checkbox"/> |                |
| Update                            | 1b | If the protocol is for an update of a previous systematic review, identify as such                                                                                                              | <input type="checkbox"/>            | <input type="checkbox"/> |                |
| <b>Registration</b>               | 2  | If registered, provide the name of the registry (e.g., PROSPERO) and registration number in the Abstract                                                                                        | <input checked="" type="checkbox"/> | <input type="checkbox"/> |                |
| <b>Authors</b>                    |    |                                                                                                                                                                                                 |                                     |                          |                |
| Contact                           | 3a | Provide name, institutional affiliation, and e-mail address of all protocol authors; provide physical mailing address of corresponding author                                                   | <input checked="" type="checkbox"/> | <input type="checkbox"/> |                |
| Contributions                     | 3b | Describe contributions of protocol authors and identify the guarantor of the review                                                                                                             | <input checked="" type="checkbox"/> | <input type="checkbox"/> |                |
| <b>Amendments</b>                 | 4  | If the protocol represents an amendment of a previously completed or published protocol, identify as such and list changes; otherwise, state plan for documenting important protocol amendments | <input checked="" type="checkbox"/> | <input type="checkbox"/> |                |
| <b>Support</b>                    |    |                                                                                                                                                                                                 |                                     |                          |                |
| Sources                           | 5a | Indicate sources of financial or other support for the review                                                                                                                                   | <input checked="" type="checkbox"/> | <input type="checkbox"/> |                |
| Sponsor                           | 5b | Provide name for the review funder and/or sponsor                                                                                                                                               | <input checked="" type="checkbox"/> | <input type="checkbox"/> |                |
| Role of sponsor/funder            | 5c | Describe roles of funder(s), sponsor(s), and/or institution(s), if any, in developing the protocol                                                                                              | <input checked="" type="checkbox"/> | <input type="checkbox"/> |                |
| <b>INTRODUCTION</b>               |    |                                                                                                                                                                                                 |                                     |                          |                |
| <b>Rationale</b>                  | 6  | Describe the rationale for the review in the context of what is already known                                                                                                                   | <input checked="" type="checkbox"/> | <input type="checkbox"/> |                |
| <b>Objectives</b>                 | 7  | Provide an explicit statement of the question(s) the review will address with reference to participants, interventions, comparators, and outcomes (PICO)                                        | <input checked="" type="checkbox"/> | <input type="checkbox"/> |                |

| Section/topic                      | #   | Checklist item                                                                                                                                                                                                                              | Information reported                |                          | Line number(s) |
|------------------------------------|-----|---------------------------------------------------------------------------------------------------------------------------------------------------------------------------------------------------------------------------------------------|-------------------------------------|--------------------------|----------------|
|                                    |     |                                                                                                                                                                                                                                             | Yes                                 | No                       |                |
| <b>METHODS</b>                     |     |                                                                                                                                                                                                                                             |                                     |                          |                |
| Eligibility criteria               | 8   | Specify the study characteristics (e.g., PICO, study design, setting, time frame) and report characteristics (e.g., years considered, language, publication status) to be used as criteria for eligibility for the review                   | <input checked="" type="checkbox"/> | <input type="checkbox"/> |                |
| Information sources                | 9   | Describe all intended information sources (e.g., electronic databases, contact with study authors, trial registers, or other grey literature sources) with planned dates of coverage                                                        | <input checked="" type="checkbox"/> | <input type="checkbox"/> |                |
| Search strategy                    | 10  | Present draft of search strategy to be used for at least one electronic database, including planned limits, such that it could be repeated                                                                                                  | <input checked="" type="checkbox"/> | <input type="checkbox"/> |                |
| <b>STUDY RECORDS</b>               |     |                                                                                                                                                                                                                                             |                                     |                          |                |
| Data management                    | 11a | Describe the mechanism(s) that will be used to manage records and data throughout the review                                                                                                                                                | <input checked="" type="checkbox"/> | <input type="checkbox"/> |                |
| Selection process                  | 11b | State the process that will be used for selecting studies (e.g., two independent reviewers) through each phase of the review (i.e., screening, eligibility, and inclusion in meta-analysis)                                                 | <input checked="" type="checkbox"/> | <input type="checkbox"/> |                |
| Data collection process            | 11c | Describe planned method of extracting data from reports (e.g., piloting forms, done independently, in duplicate), any processes for obtaining and confirming data from investigators                                                        | <input checked="" type="checkbox"/> | <input type="checkbox"/> |                |
| Data items                         | 12  | List and define all variables for which data will be sought (e.g., PICO items, funding sources), any pre-planned data assumptions and simplifications                                                                                       | <input checked="" type="checkbox"/> | <input type="checkbox"/> |                |
| Outcomes and prioritization        | 13  | List and define all outcomes for which data will be sought, including prioritization of main and additional outcomes, with rationale                                                                                                        | <input checked="" type="checkbox"/> | <input type="checkbox"/> |                |
| Risk of bias in individual studies | 14  | Describe anticipated methods for assessing risk of bias of individual studies, including whether this will be done at the outcome or study level, or both; state how this information will be used in data synthesis                        | <input checked="" type="checkbox"/> | <input type="checkbox"/> |                |
| <b>DATA</b>                        |     |                                                                                                                                                                                                                                             |                                     |                          |                |
| Synthesis                          | 15a | Describe criteria under which study data will be quantitatively synthesized                                                                                                                                                                 | <input checked="" type="checkbox"/> | <input type="checkbox"/> |                |
|                                    | 15b | If data are appropriate for quantitative synthesis, describe planned summary measures, methods of handling data, and methods of combining data from studies, including any planned exploration of consistency (e.g., $I^2$ , Kendall's tau) | <input checked="" type="checkbox"/> | <input type="checkbox"/> |                |
|                                    | 15c | Describe any proposed additional analyses (e.g., sensitivity or subgroup analyses, meta-regression)                                                                                                                                         | <input checked="" type="checkbox"/> | <input type="checkbox"/> |                |
|                                    | 15d | If quantitative synthesis is not appropriate, describe the type of summary planned                                                                                                                                                          | <input checked="" type="checkbox"/> | <input type="checkbox"/> |                |
| Meta-bias(es)                      | 16  | Specify any planned assessment of meta-bias(es) (e.g., publication bias across studies, selective                                                                                                                                           | <input type="checkbox"/>            | <input type="checkbox"/> |                |

1  
2  
3  
4  
5  
6  
7  
8  
9  
10  
11  
12  
13  
14  
15  
16  
17  
18  
19  
20  
21  
22  
23  
24  
25  
26  
27  
28  
29  
30  
31  
32  
33  
34  
35  
36  
37  
38  
39  
40  
41  
42  
43  
44  
45  
46

| Section/topic                            | #  | Checklist item                                                                   | Information reported                |                          | Line number(s) |
|------------------------------------------|----|----------------------------------------------------------------------------------|-------------------------------------|--------------------------|----------------|
|                                          |    |                                                                                  | Yes                                 | No                       |                |
|                                          |    | reporting within studies)                                                        |                                     |                          |                |
| <b>Confidence in cumulative evidence</b> | 17 | Describe how the strength of the body of evidence will be assessed (e.g., GRADE) | <input checked="" type="checkbox"/> | <input type="checkbox"/> |                |

For peer review only
