# Supplementary material for: Is there an association between long-term antibiotics for acne and subsequent infection sequelae and antimicrobial resistance? A systematic review protocol
Source: PubMed Central journal article supplement (PMC7333805; doi:10.1136/bmjopen-2019-033662), 2020-07-02
Supplement: bmjopen-2019-033662supp001.pdf [file bmjopen-2019-033662supp001.pdf]

Database: Ovid MEDLINE(R) and Epub Ahead of Print, In-Process & Other Non-Indexed Citations, Daily and Versions(R) <1946 to June 21, 2019>

Search Strategy:

- 
- 1 acne.mp. (17491)
  - 2 exp Acne Vulgaris/ (11259)
  - 3 1 or 2 (17491)
  - 4 antibiotic\*.mp. (355427)
  - 5 exp Antibiotic Prophylaxis/ (13110)
  - 6 exp Anti-Bacterial Agents/ (700080)
  - 7 tetracycline\*.mp. (45045)
  - 8 exp Tetracycline/ (19631)
  - 9 exp Tetracyclines/ (46884)
  - 10 lymecycline\*.mp. (168)
  - 11 exp Lymecycline/ (119)
  - 12 minocycline\*.mp. (8527)
  - 13 exp Minocycline/ (5724)
  - 14 doxycycline\*.mp. (16071)
  - 15 exp Doxycycline/ (9287)
  - 16 oxytetracycline\*.mp. (8262)
  - 17 exp Oxytetracycline/ (6279)
  - 18 macrolide\*.mp. (22555)
  - 19 Macrolides/ (11795)
  - 20 exp Erythromycin/ (24397)
  - 21 erythromycin\*.mp. (25510)
  - 22 clarithromycin\*.mp. (10167)
  - 23 exp Clarithromycin/ (6062)
  - 24 azithromycin\*.mp. (8538)
  - 25 exp Azithromycin/ (4820)
  - 26 dihydrofolate reductase inhibitor\*.mp. (346)
  - 27 exp Folic Acid Antagonists/ (57013)
  - 28 trimethoprim\*.mp. (21485)
  - 29 exp Trimethoprim/ (11693)
  - 30 exp Trimethoprim, Sulfamethoxazole Drug Combination/ (6696)
  - 31 penicillin\*.mp. (82869)
  - 32 exp Penicillin-Binding Proteins/ (3293)
  - 33 exp Penicillin G/ (38077)
  - 34 cephalosporin\*.mp. (32358)
  - 35 exp Cephalosporins/ (41273)
  - 36 exp beta-Lactamases/ (22172)
  - 37 fluoroquinolone\*.mp. (22199)
  - 38 exp Fluoroquinolones/ (31393)
  - 39 exp Ciprofloxacin/ (12824)
  - 40 aminoglycoside\*.mp. (23235)
  - 41 exp Aminoglycosides/ (151256)
  - 42 exp Gentamicins/ (18634)
  - 43 antimicrobial\*.mp. (154537)
  - 44 exp Antimicrobial Stewardship/ (725)
  - 45 exp Disk Diffusion Antimicrobial Tests/ (1536)
  - 46 4 or 5 or 6 or 7 or 8 or 9 or 10 or 11 or 12 or 13 or 14 or 15 or 16 or 17 or 18 or 19 or 20

or 21 or 22 or 23 or 24 or 25 or 26 or 27 or 28 or 29 or 30 or 31 or 32 or 33 or 34 or 35 or 36 or  
37 or 38 or 39 or 40 or 41 or 42 or 43 or 44 or 45 (1080981)  
47 resistance\*.mp. (827828)  
48 exp beta-Lactam Resistance/ (26155)  
49 exp Drug Resistance, Microbial/ or exp Microbial Sensitivity Tests/ (231349)  
50 exp Drug Resistance, Multiple/ (33795)  
51 exp Drug Resistance, Bacterial/ (83040)  
52 exp Methicillin Resistance/ (10188)  
53 exp Multidrug Resistance-Associated Proteins/ (14320)  
54 exp Vancomycin Resistance/ (3263)  
55 47 or 48 or 49 or 50 or 51 or 52 or 53 or 54 (900383)  
56 43 or 44 [antimicrobial altogether] (154537)  
57 55 and 56 [antimicrobial AND resistance] (70921)  
58 46 and 55 [antibiotic AND resistance] (248811)  
59 infect\*.mp. (2131927)  
60 exp Escherichia coli/ (270735)  
61 exp Bacteriophages/ (56525)  
62 exp Infection/ (760393)  
63 infection\*.mp. (1804659)  
64 59 or 60 or 61 or 62 [infection altogether] (2649927)  
65 55 or 57 or 58 [resistance OR antimicrobial resistance OR antibiotic resistance] (900383)  
66 64 or 65 [infection OR resistance altogether] (3306493)  
67 3 and 66 [combined with acne] (3142)
